# Supplementary material for: Ultrahigh Energy and Power Densities of d-MXene-Based Symmetric Supercapacitors
Source: MDPI journal article supplement (doi:10.3390/nano12193294), 2022-09-22
Supplement: s1 [file s1]

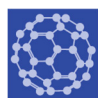

## Supplementary Information

# Ultrahigh Energy and Power Densities of d-MXene-Based Symmetric Supercapacitors

Beenish Mustafa <sup>1</sup>, Wengang Lu <sup>1</sup>, Zhiyuan Wang <sup>1</sup>, Fuzhuo Lian <sup>1</sup>, Andy Shen <sup>2</sup>, Bing Yang <sup>2</sup>, Jun Yuan <sup>2</sup>, Chang Wu <sup>2</sup>, Yangbowen Liu <sup>2</sup>, Weiwei Hu <sup>3</sup>, Lei Wang <sup>1,4,\*</sup> and Geliang Yu <sup>1,4,\*</sup>

<sup>1</sup> National Laboratory of Solid-State Microstructures, School of Physics, Nanjing University, No. 22, Hankou Road, Nanjing 210093, China; dg1822501@smail.nju.edu.cn (B.M.); mf1922006@smail.nju.edu.cn (W.L.); mg21220104@smail.nju.edu.cn (Z.W.); mg20220101@smail.nju.edu.cn (F.L.)

<sup>2</sup> Hubei Jiufengshan Laboratory, Wuhan 430206, China; andyshen@jfsllab.com.cn (A.S.); yangbing@jfsllab.com.cn (B.Y.); yuanjun@jfsllab.com.cn (J.Y.); wuchang@jfsllab.com.cn (C.W.); liuyangbowen@jfsllab.com.cn (Y.L.)

<sup>3</sup> Jiangsu Industrial Technology Research Institute, Nanjing 210093, China; huww@jitri.cn

<sup>4</sup> Collaborative Innovation Centre of Advanced Microstructures, Nanjing University, Nanjing 210093, China

\* Correspondence: leiwang@nju.edu.cn (L.W.); yugeliang@nju.edu.cn (G.Y.)

**Citation:** Mustafa, B.; Lu, W.; Wang, Z.; Lian, F.; Shen, A.; Yang, B.; Yuan, J.; Wu, C.; Liu, Y.; Hu, W.; et al. Ultrahigh Energy and Power Densities of d-MXene-Based Symmetric Supercapacitors. *Nanomaterials* **2022**, *12*, 3294. <https://doi.org/10.3390/nano12193294>

Academic Editor: Sergio Brutti

Received: 16 August 2022

Accepted: 14 September 2022

Published: 22 September 2022

**Publisher's Note:** MDPI stays neutral with regard to jurisdictional claims in published maps and institutional affiliations.

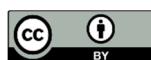

**Copyright:** © 2022 by the authors. Licensee MDPI, Basel, Switzerland. This article is an open access article distributed under the terms and conditions of the Creative Commons Attribution (CC BY) license (<https://creativecommons.org/licenses/by/4.0/>).

## Electrochemical Experiment and measurement:

All electrochemical tests were conducted by using an Electrochemical workstation CHI660E by using two types of setup, a three-electrode setup, and two electrodes as shown in Fig. S1a and S1b. In the three-electrode setup, a platinum electrode was used as the counter electrode, both MXene and MX/AuNPs free-standing films are used as a working electrode and Ag/AgCl was the reference electrode. Aqueous 1M and 3 M H<sub>2</sub>SO<sub>4</sub> electrolyte and a cellulose membrane was used as the separators. All the electrodes were pre-cycled for 20 cycles using Cyclic Voltammetry (CV) at 20 mV s<sup>−1</sup> before the actual electrochemical tests were performed. Moreover, the electrodes were dipped in the aqueous solution H<sub>2</sub>SO<sub>4</sub> for 24hrs before testing. The CV tests for different MXene electrodes were performed at scan rates of 5–100 mV s<sup>−1</sup>. Galvanostatic charge-discharge (GCD) cycling was performed at different current densities. To check the cyclic stability and capacitance retention CV cycle was performed at 50 and 100 mVs<sup>−1</sup> for 5000cycles. The specific capacitance was calculated from the CV curves in the three-electrode setup can be calculated using the following formula.

$$C_s = \frac{\int I dV}{m \nu \Delta V} \quad (S1)$$

Where,  $\Delta V$  (V) is the potential window,  $m$  (g) is the mass of the working electrode,  $V$  (V) is the potential versus reference electrode,  $I$  (A) is the response current,  $\nu$  (V s<sup>−1</sup>) is the scan rate,  $C_s$  (F g<sup>−1</sup>) is specific capacitance.

In the two-electrode cell,  $C_s$  values of the electrodes in the symmetric supercapacitor can be obtained by the following equation using the CV curves.

$$C_s = \frac{\int I dV}{M \nu \Delta V} \quad (S2)$$

where  $M$  (g) is the mass of both electrodes and  $\nu$  (V s<sup>−1</sup>) is the scan rate. The volumetric capacitance of film electrodes can be calculated according to Eqs. 3 and 4:

$$C_v = \rho C_s \quad (S3)$$

$$\rho = \frac{m}{sd} \quad (S4)$$

where  $S$  (cm<sup>2</sup>) and  $d$  (cm) are the surface area and thickness of film electrode, respectively.

The Energy density (Wh kg<sup>−1</sup>) and power density (W Kg<sup>−1</sup>) can be calculated by using following equations.

$$E = \frac{0.5 \times C_s \times (\Delta V)^2}{3.6} \quad (S5)$$

$$p = \frac{E \times 3600}{\Delta t} \quad (S6)$$

where  $\Delta t$  is the discharge time according to the CV curves ( $\Delta t = \frac{\Delta V}{v}$ )

The coulombic efficiency was calculated from GCD curves according to the following equation:

$$C_E = \frac{\Delta t_d}{\Delta t_c} \quad (S7)$$

Where,  $\Delta t_d$  and  $\Delta t_c$  are the time of discharging and charging, respectively, and CE is coulombic efficiency.

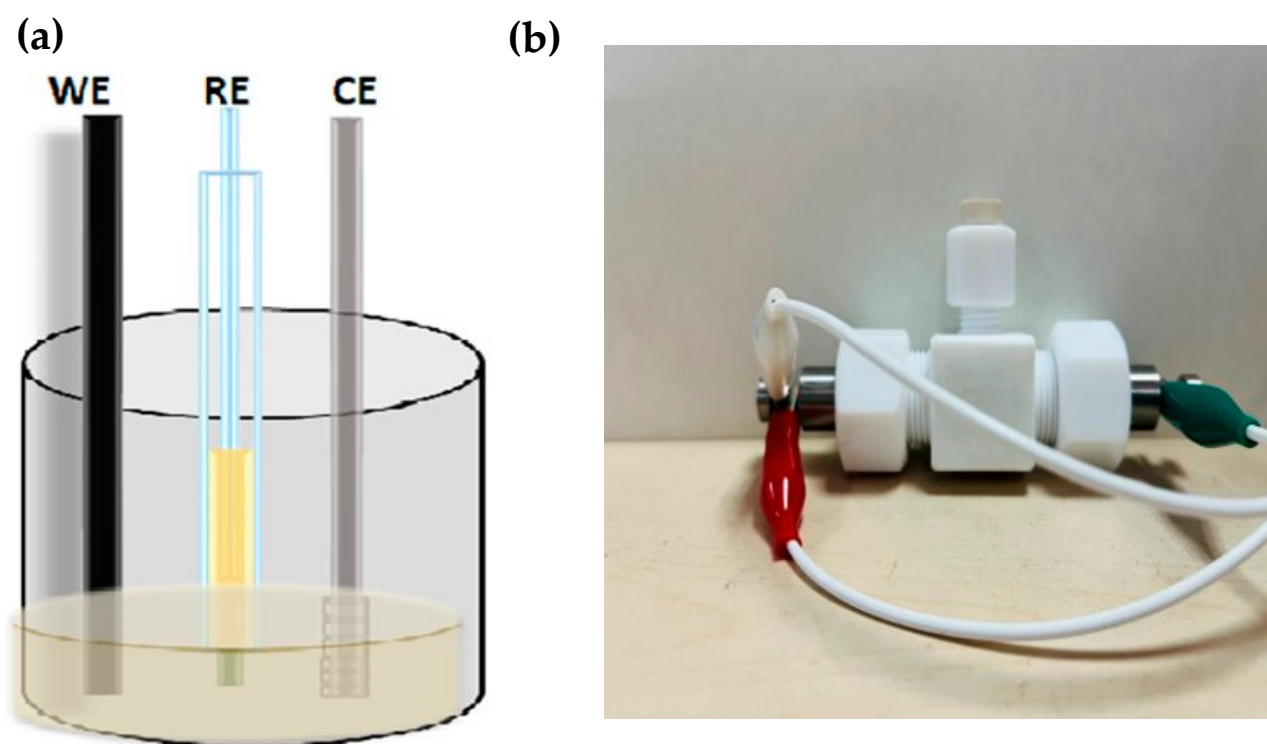

**Figure S1.** (a) Illustration of three-electrode setup; (b) Digital photo of two setup using Swagelok cell.

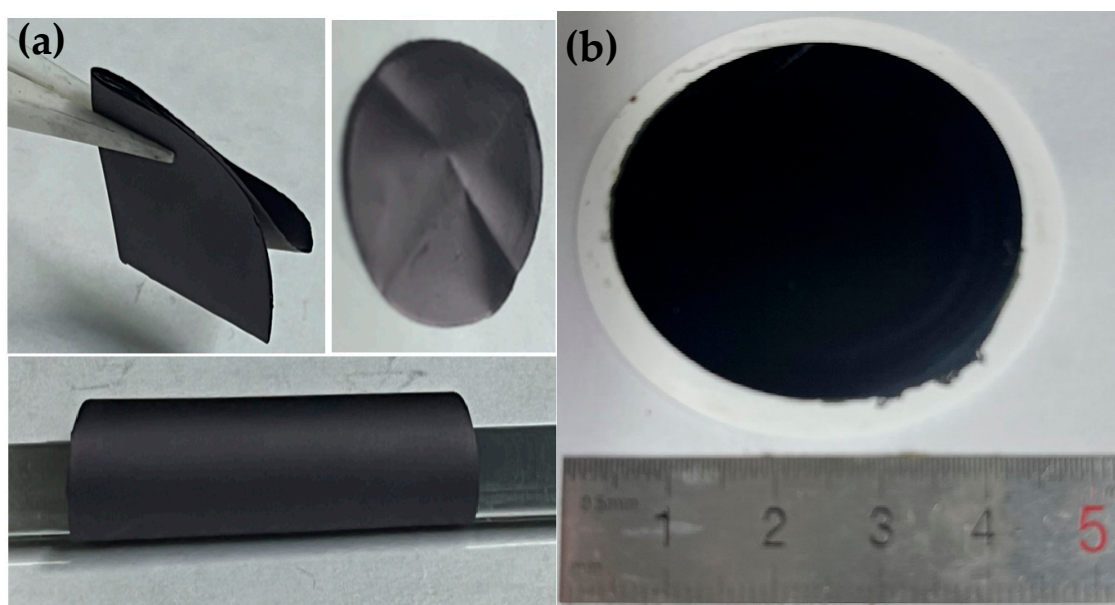

**Figure S2.** (a) the digital photograph of the free-standing film, showing excellent flexibility at different deformation statuses, which can be bent, rolled, and even folded; (b) digital photo along the scale.

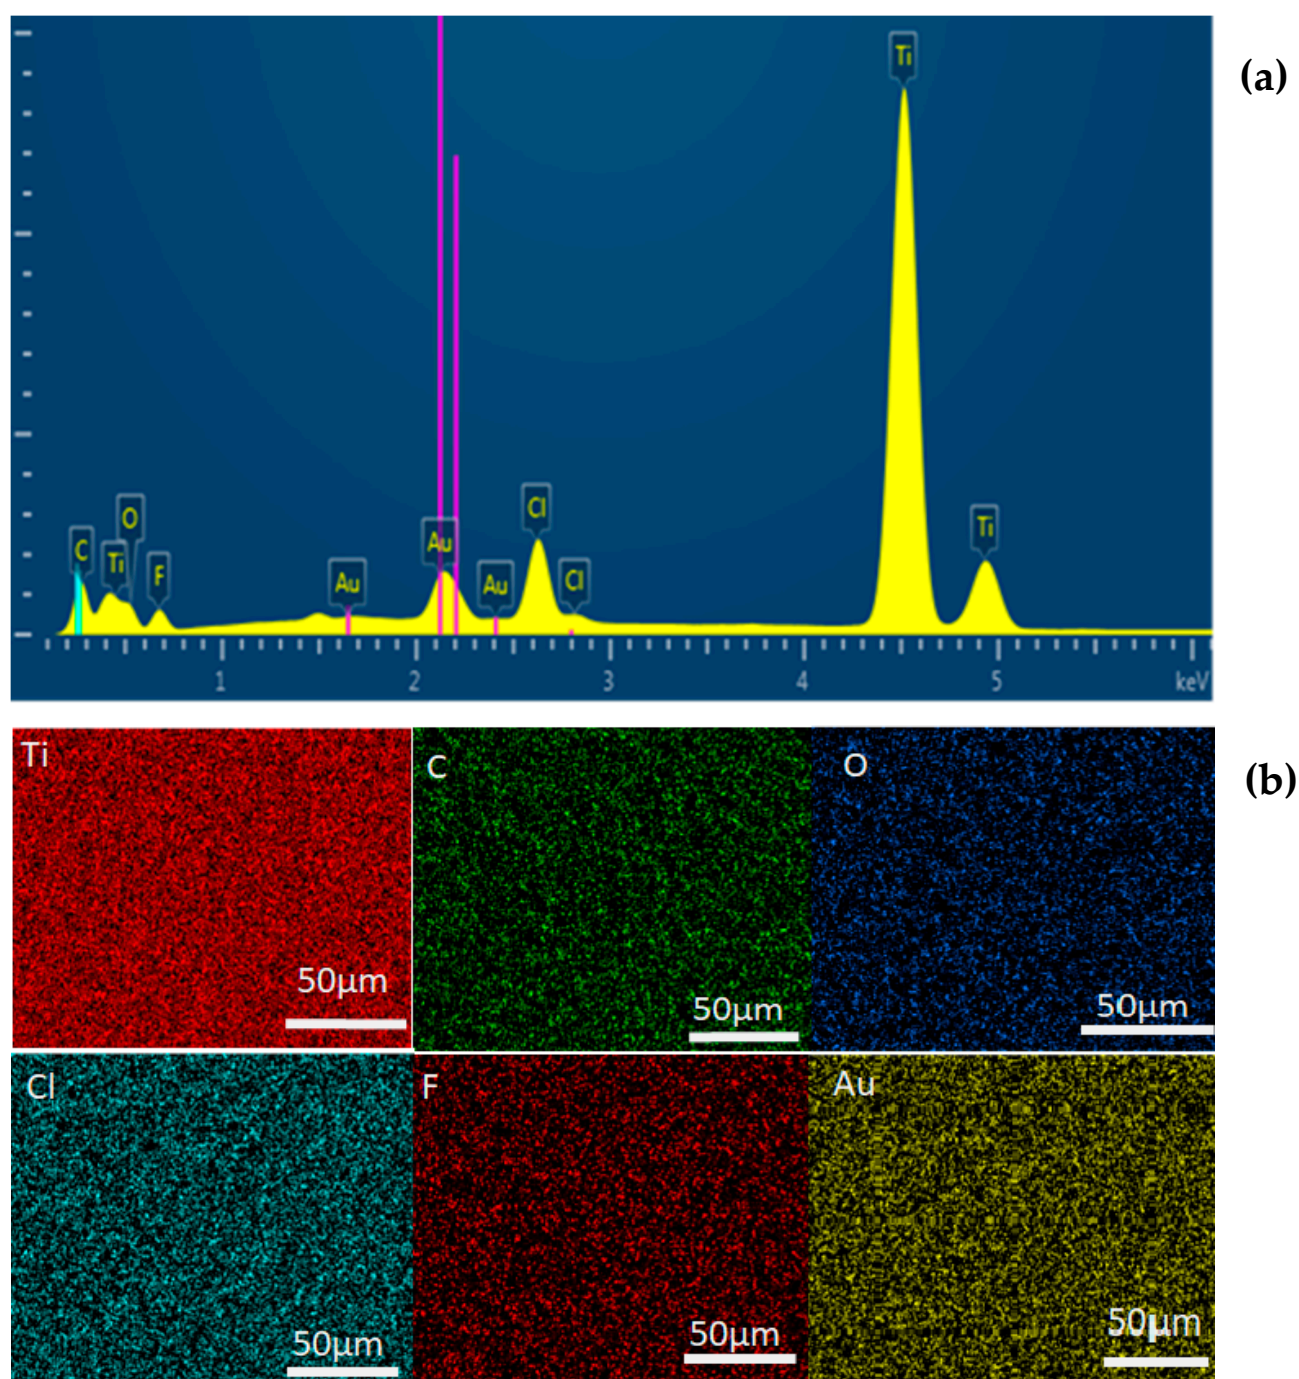

**Figure S3.** (a) EDS spectrum of MX/AuNP film; (b) The elemental mapping of MX/Au free-standing film.



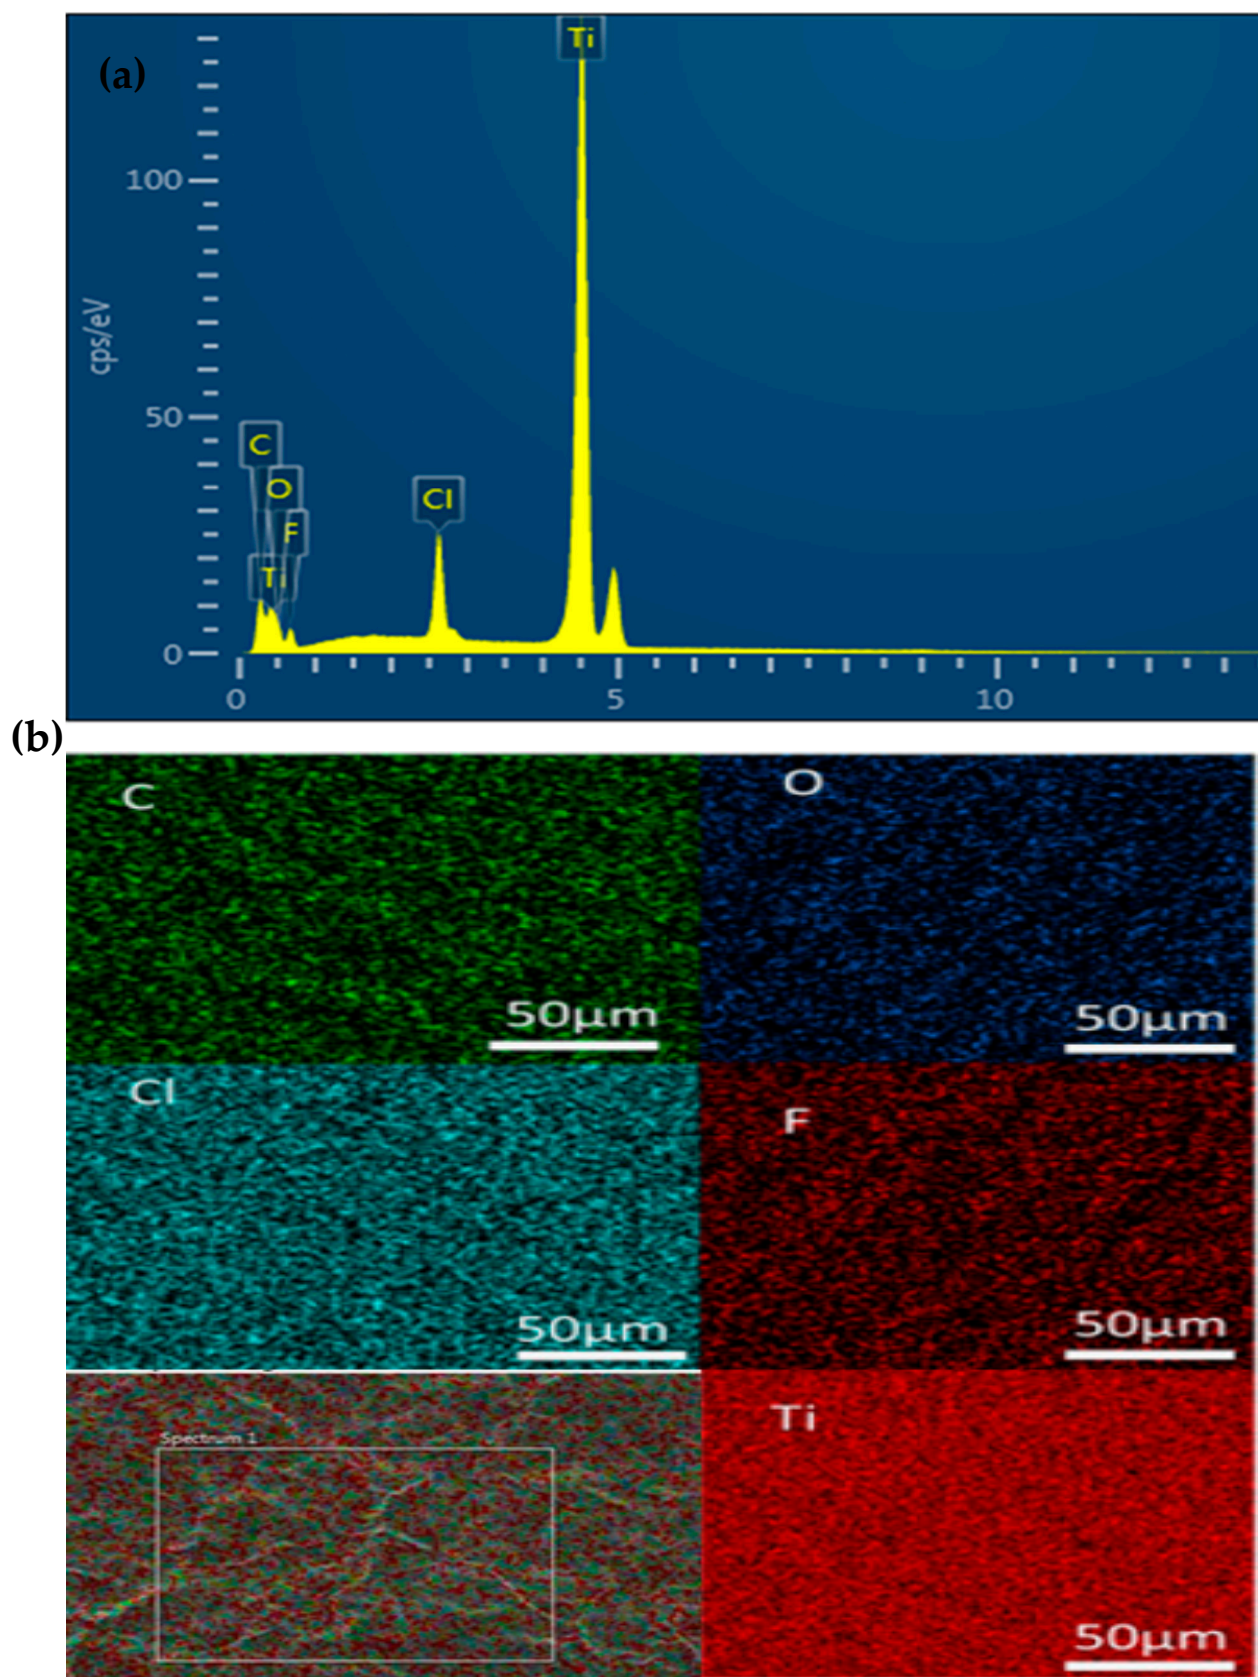

**Figure S4.** (a) EDS spectrum of MXene film; (b) The elemental mapping of MXene free-standing film.

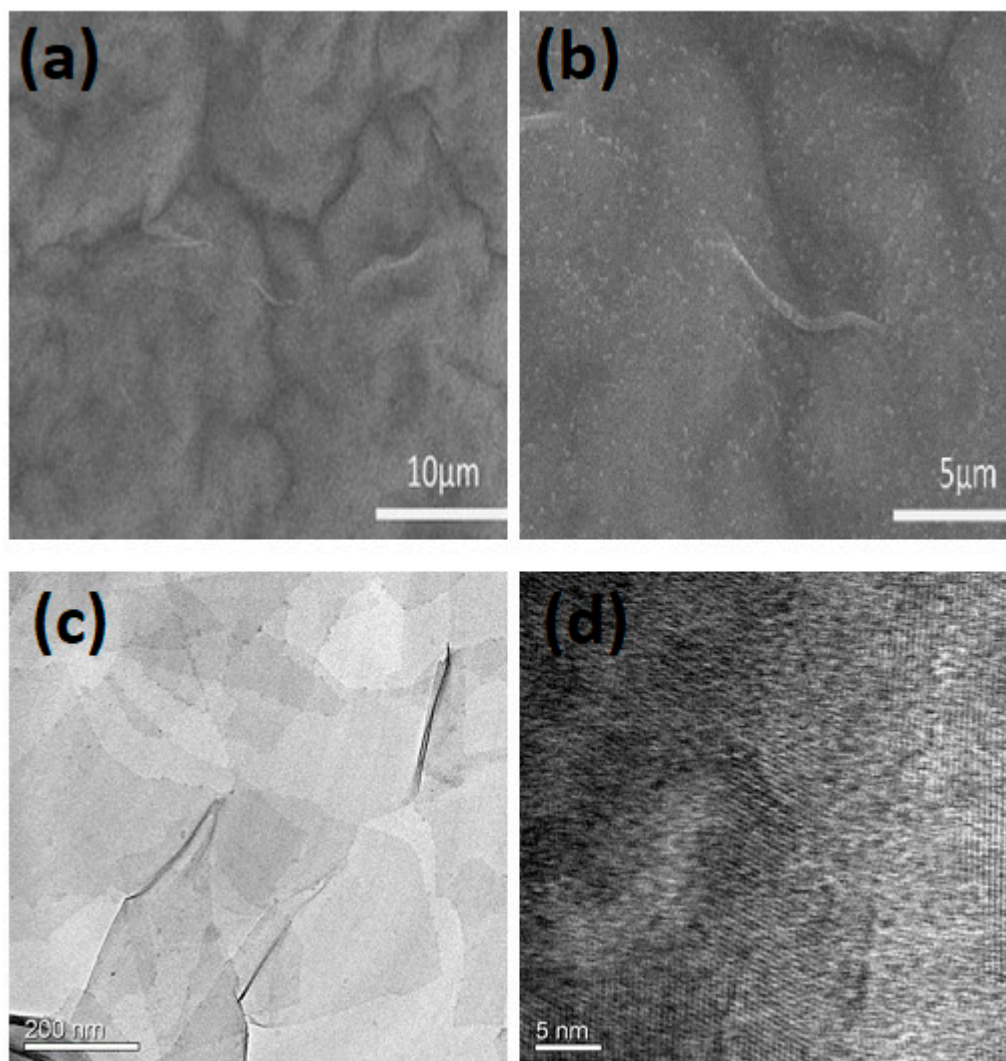

**Figure S5.** (a, b) SEM images of Mxene films; (c) TEM image of Mxene film (d) HRTEM image of Mxene film.

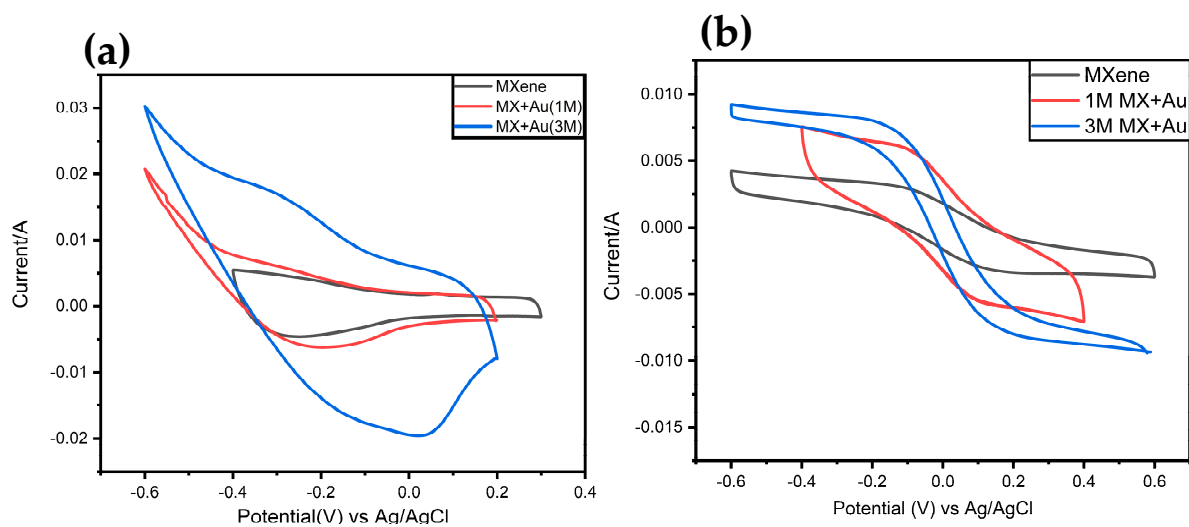

**Figure S6.** (a) CV curves of MX and MX/AuNPs in three electrodes setup at  $5\text{mVs}^{-1}$ ; (b) CV curves Symmetric SCs of MXene and MX/AuNPs at  $5\text{mVs}^{-1}$ .

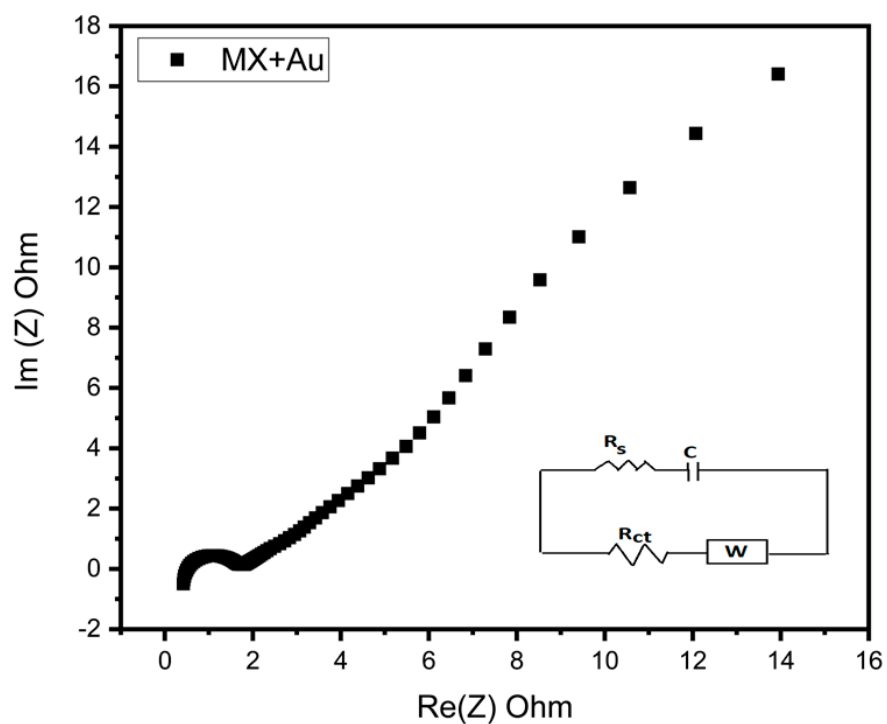

**Figure S7.** Nyquist plots of symmetric SC of MX/AuNPs, Inset shows the equivalent circuit model.

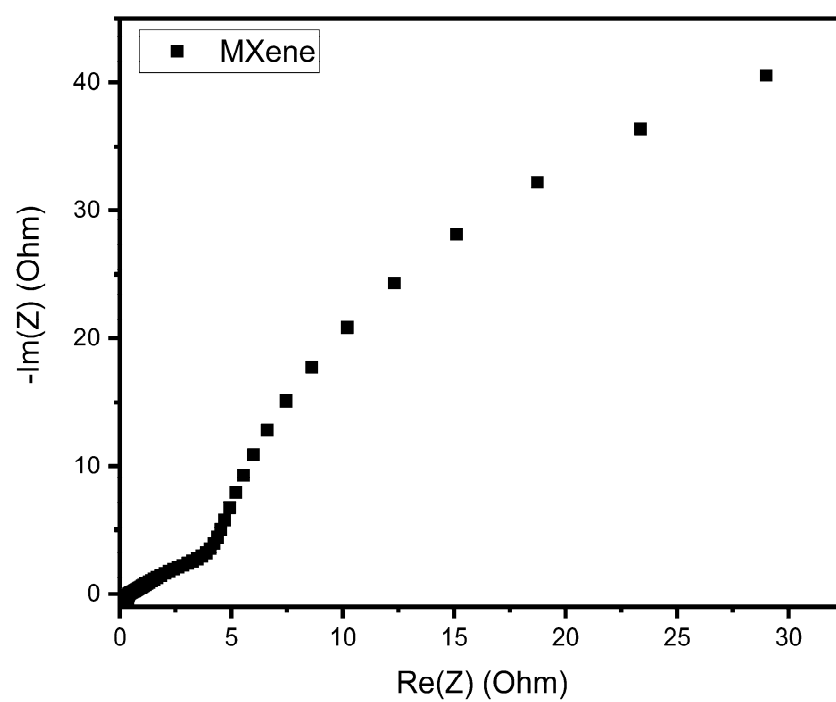

Figure S8. Nyquist plots of symmetric SC of MXene.

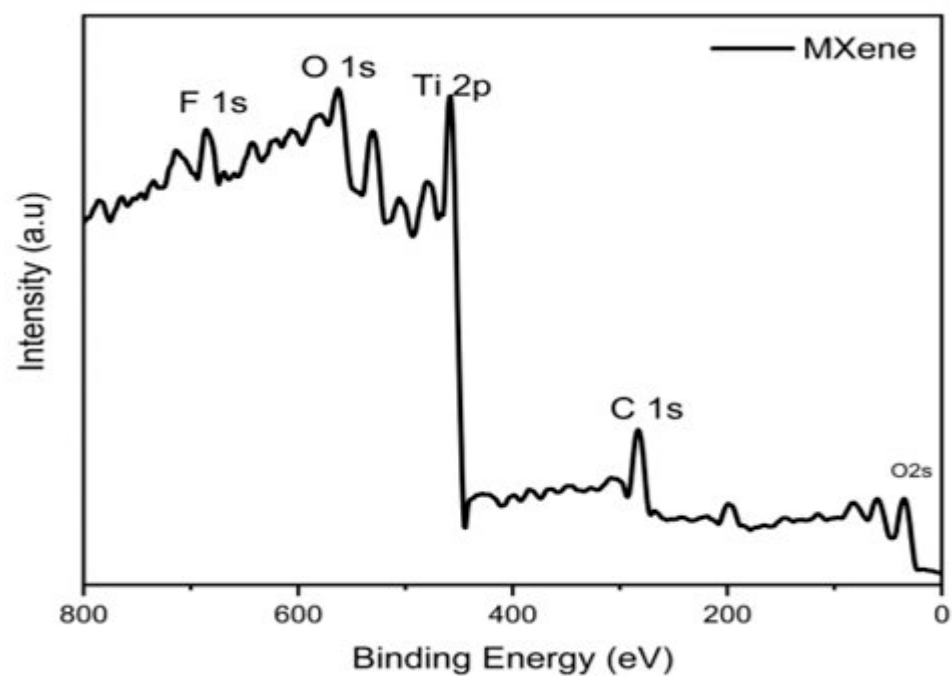

Figure S9. The survey spectra of MXene film.



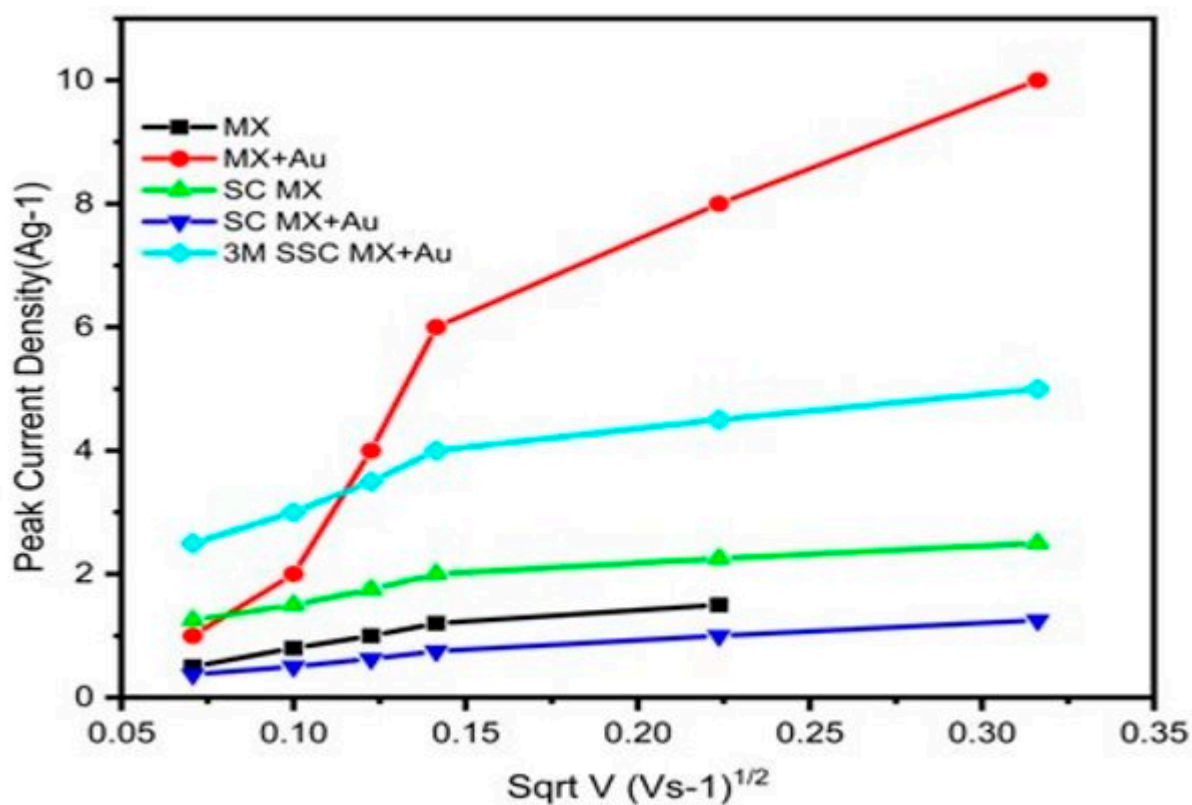

**Figure S10.** Graph between the peak current densities of all the tested electrodes Vs square root of Scan Rate.

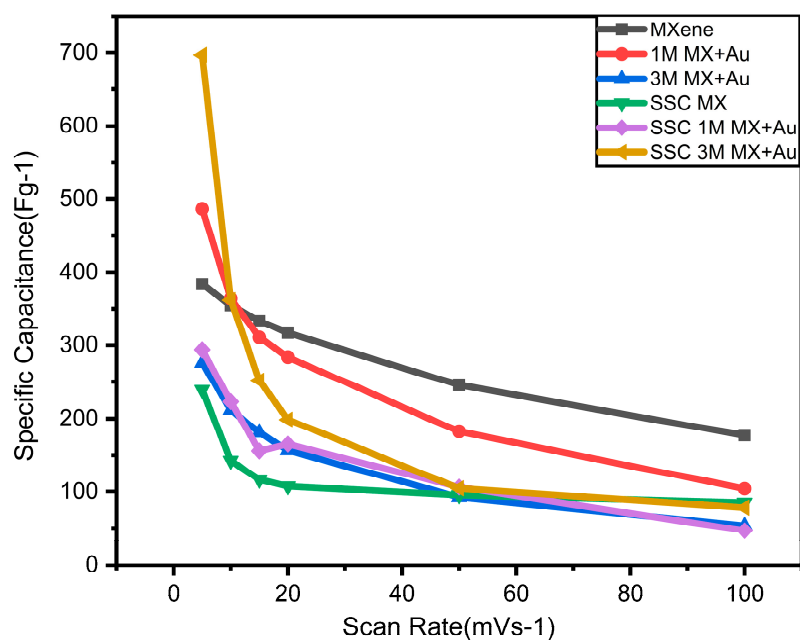

**Figure S11.** Specific capacitance of MXene and MX/AuNPs electrode and Symmetric SCs vs. the scan rate.

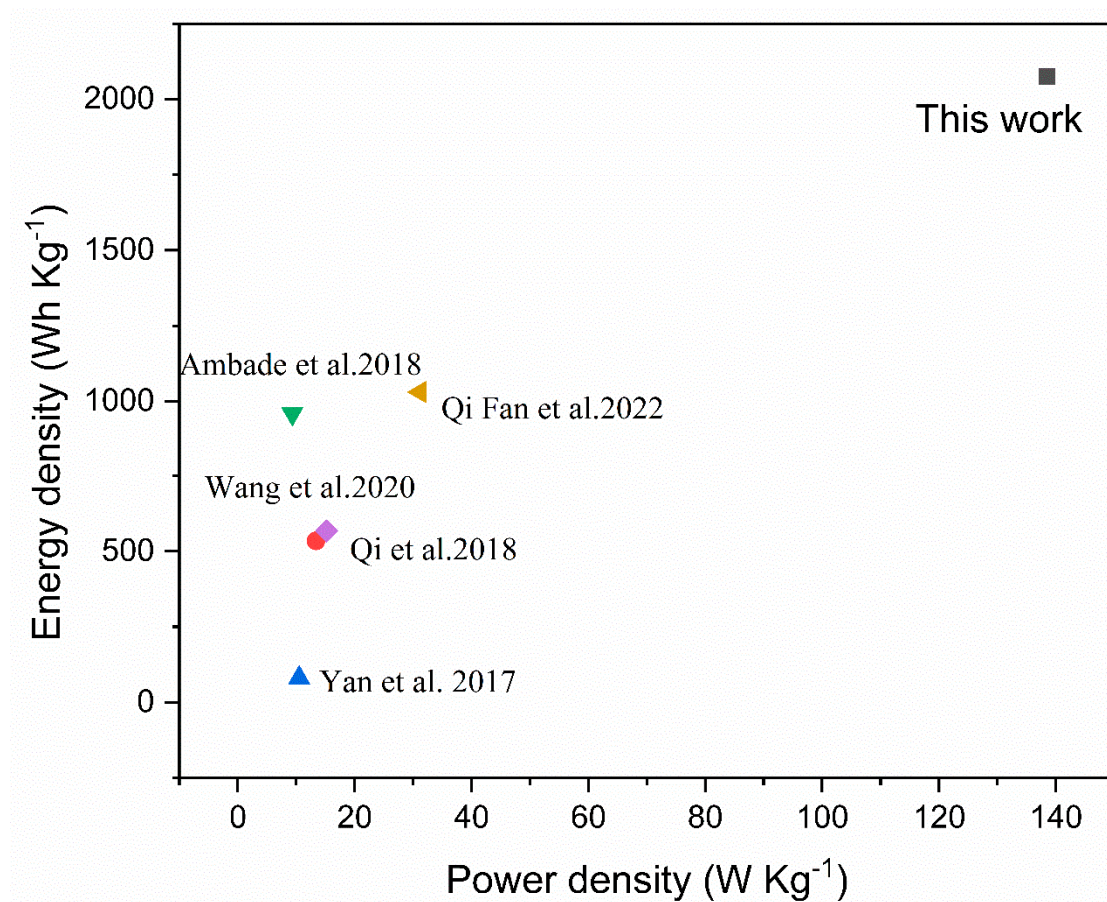

**Figure S12.** Ragone plots displaying energy and power densities of MX/AuNPs symmetric supercapacitor in comparison with other MXene-based supercapacitors.

**Table S1.** EDS results of the Mxene and MX/AuNPs.

| Element | MXene    |          | MX/AuNps |          |
|---------|----------|----------|----------|----------|
|         | Atomic % | Weight % | Atomic % | Weight % |
| Ti      | 36.18    | 62.61    | 32.92    | 32.92    |
| C       | 26.04    | 11.30    | 28.42    | 28.42    |
| O       | 19.77    | 11.43    | 18.36    | 18.36    |
| F       | 14.16    | 9.72     | 15.84    | 15.84    |
| Cl      | 3.86     | 4.94     | 3.48     | 3.48     |
| Au      | -        | -        | 0.98     | 6.80     |

**Table S2.** Comparison of electrochemical performance of different MXene-based materials as a symmetric supercapacitor.

| Electrode material  | Electrolyte                       | Specific Capacitance (Fg <sup>-1</sup> ) | Energy Density (Wh Kg <sup>-1</sup> ) | Power Density (W kg <sup>-1</sup> ) | Ref.      |
|---------------------|-----------------------------------|------------------------------------------|---------------------------------------|-------------------------------------|-----------|
| MX/AuNP             | 3M H <sub>2</sub> SO <sub>4</sub> | 696.67                                   | 138.44                                | 2076                                | This work |
| M/ MoO <sub>3</sub> | 1M H <sub>2</sub> SO <sub>4</sub> | 545                                      | 13.4                                  | 534.6                               | 1         |
| M/G-5%              | 3M H <sub>2</sub> SO <sub>4</sub> | 335                                      | 10.5                                  | 80.3                                | 2         |

|                       |                                     |       |      |        |   |
|-----------------------|-------------------------------------|-------|------|--------|---|
| MXene/WO <sub>3</sub> | 0.5M H <sub>2</sub> SO <sub>4</sub> | 566   | 9.32 | 960    | 3 |
| TCBOC                 | 1 M KOH                             | 247.8 | 15.2 | 567.4  | 4 |
| PPy-MXene             | Ionic Liquid                        | 51.85 | 31.2 | 1030.4 | 5 |

## References

1. Wang, Y.; Wang, X.; Li, X.; Liu, R.; Bai, Y.; Xiao, H.; Liu, Y.; Yuan, G., Intercalating ultrathin moo<sub>3</sub> nanobelts into mxene film with ultrahigh volumetric capacitance and excellent deformation for high-energy-density devices. *Nano-micro letters* **2020**, *12*, 1-14.
2. Yan, J.; Ren, C.E.; Maleski, K.; Hatter, C.B.; Anasori, B.; Urbankowski, P.; Sarycheva, A.; Gogotsi, Y., Flexible mxene/graphene films for ultrafast supercapacitors with outstanding volumetric capacitance. *Advanced Functional Materials* **2017**, *27*, 1701264.
3. Ambade, S.B.; Ambade, R.B.; Eom, W.; Noh, S.H.; Kim, S.H.; Han, T.H., 2d ti<sub>3</sub>c<sub>2</sub> mxene/wo<sub>3</sub> hybrid architectures for high-rate supercapacitors. *Advanced Materials Interfaces* **2018**, *5*, 1801361.
4. Xia, Q.X.; Shinde, N.M.; Yun, J.M.; Zhang, T.; Mane, R.S.; Mathur, S.; Kim, K.H., Bismuth oxychloride/mxene symmetric supercapacitor with high volumetric energy density. *Electrochimica Acta* **2018**, *271*, 351-360.
5. Fan, Q.; Zhao, R.; Yi, M.; Qi, P.; Chai, C.; Ying, H.; Hao, J., Ti<sub>3</sub>c<sub>2</sub>-mxene composite films functionalized with polypyrrole and ionic liquid-based microemulsion particles for supercapacitor applications. *Chemical Engineering Journal* **2022**, *428*, 131107.
